# Early Microvascular Dysfunction in Healthy Normal-Weight Males With Heredity for Type 2 Diabetes

GUN JÖRNESKOG, MD, PHD<sup>1</sup>  
 MAJID KALANI, MD, PHD<sup>2</sup>  
 JEANETTE KUHL, MD<sup>3</sup>  
 PETER BÄVENHOLM, MD, PHD<sup>4</sup>  
 ABRAM KATZ, MD, PHD<sup>5</sup>  
 GUSTAF ALLERSTRAND, MD<sup>1</sup>

MICHAEL ALVARSSON MD, PHD<sup>3</sup>  
 SUAD EFENDIC, MD, PHD<sup>3</sup>  
 CLAES-GÖRAN ÖSTENSON, MD, PHD<sup>3</sup>  
 JOHN PERNOW, MD, PHD<sup>2</sup>  
 JOHN WAHREN, MD, PHD<sup>6</sup>  
 KERSTIN BRISMAR, MD, PHD<sup>3</sup>

The pathogenesis behind diabetic microangiopathy is complex; both genetic (1–3) and metabolic factors (4–6) are clearly of importance. Recently, it has been demonstrated that not only patients with diabetes but also healthy individuals at risk for diabetes have functional vascular disturbances (7). These findings suggest that factors other than hyperglycemia are of importance for microvascular dysfunction. The aim of the present study was to investigate whether genetic factors (heredity for type 2 diabetes) are associated with disturbances in nutritive skin capillary circulation, non-nutritive skin microcirculation, and/or brachial macrocirculation.

## RESEARCH DESIGN AND METHODS

Subjects were from the Stockholm Diabetes Prevention Program, a population-based study (8). Normal-weight men who were free of medication, who were nonsmokers, and who had normal oral glucose tolerance tests and insulin sensitivity as assessed by a hyperinsulinemic-euglycemic clamp (9)

were investigated. Ten men with heredity for type 2 diabetes were matched for age and BMI with 10 men without heredity. Heredity for type 2 diabetes was defined as known diabetes in at least two second-degree relatives (grandparent, uncle, or aunt) or in at least one first-degree relative in the generation of the proband (sister or brother) or the parents (8).

The investigations were performed in the morning after an overnight fast. The vascular investigations were performed after 20 min of supine rest at a room temperature of 22–24°C.

Nonnutritive skin microcirculation of the left forearm was studied with laser Doppler perfusion imaging before and after iontophoretic application of acetylcholine (Ach; endothelium dependent) and sodium nitroprusside (SNP; nonendothelium dependent) (10,11). An electrode chamber (Perilont 382; Perimed, Järfälla, Sweden) was filled with a small volume (~250  $\mu$ l) of either Ach 1% (55 mmol/l) or SNP 1% (33 mmol/l) and attached to the volar side of the forearm. A battery-powered iontophoresis controller

(Perimed) provided a direct current (0.2 mA for 60 s) for drug iontophoresis. The changes in skin blood cell flux before and after iontophoresis were studied by laser Doppler perfusion imaging (Lisca PIM II; Lisca Development, Linköping, Sweden). The coefficients of variation (CVs) for peak microcirculatory flux after iontophoresis of Ach and SNP were 21 and 19%, respectively (11).

Nailfold capillaries of the fourth finger of the left hand were visualized (12), and the capillary blood cell velocity (CBV) was determined by a computerized, videophotometric, cross-correlation technique (Capiflow, Stockholm, Sweden). Resting CBV was measured in suitable capillaries with good contrast and visible signals (12–14), and peak CBV (in millimeters per second) and time-to-peak CBV (in seconds) were measured following release of 1-min arterial occlusion of the proximal phalanx of the finger with a cuff pressure of 200 mmHg (13,15–17). For reproducibility see Jörneskog and colleagues (13,15).

Endothelial function of macrocirculation was studied by ultrasound during flow-mediated vasodilatation (FMD) of the brachial artery (18,19). The inner diameter of the brachial artery was determined before and 1 min following forearm ischemia using an 8-MHz transducer. Nonendothelium-dependent dilatation was determined 4 min after administration of sublingual nitroglycerine (0.4 mg). The mean variation of FMD was  $1.8 \pm 1.0\%$ , and the CV was 26%.

Data are given as means  $\pm$  SD. The Mann-Whitney *U* test was used to test differences between groups. Microcirculatory variables measured during iontophoresis were evaluated with two-factor repeated-measures ANOVA. A value of  $P < 0.05$  was considered statistically significant.

**RESULTS** — There were no significant differences in age (with heredity,  $53 \pm 5.0$  vs. without heredity,  $51 \pm 3.8$  years), waist-to-hip ratio ( $0.86 \pm 0.04$  vs.  $0.85 \pm$

From the <sup>1</sup>Department of Internal Medicine, Danderyd University Hospital, Karolinska Institute at Danderyd Hospital, Stockholm, Sweden; the <sup>2</sup>Department of Cardiology, Karolinska University Hospital Solna, Karolinska Institute, Stockholm, Sweden; the <sup>3</sup>Department of Endocrinology and Diabetology, Karolinska University Hospital Solna, Karolinska Institute, Stockholm, Sweden; the <sup>4</sup>Department of Internal Medicine, Karolinska University Hospital Solna, Karolinska Institute, Stockholm, Sweden; the <sup>5</sup>Department of Physiology and Pharmacology, Karolinska University Hospital Solna, Karolinska Institute, Stockholm, Sweden; and the <sup>6</sup>Department of Surgical Sciences, Karolinska University Hospital Solna, Karolinska Institute, Stockholm, Sweden.

Address correspondence and reprint requests to Gun Jörneskog, MD, PhD, Department of Internal Medicine, Danderyd University Hospital, S-18288 Stockholm, Sweden. E-mail: gun.jorneskog@ds.se.

Received for publication 21 February 2005 and accepted in revised form 9 March 2005.

**Abbreviations:** Ach, acetylcholine; CBV, capillary blood cell velocity; FMD, flow-mediated vasodilatation; SNP, sodium nitroprusside.

A table elsewhere in this issue shows conventional and Système International (SI) units and conversion factors for many substances.

© 2005 by the American Diabetes Association.

The costs of publication of this article were defrayed in part by the payment of page charges. This article must therefore be hereby marked "advertisement" in accordance with 18 U.S.C. Section 1734 solely to indicate this fact.

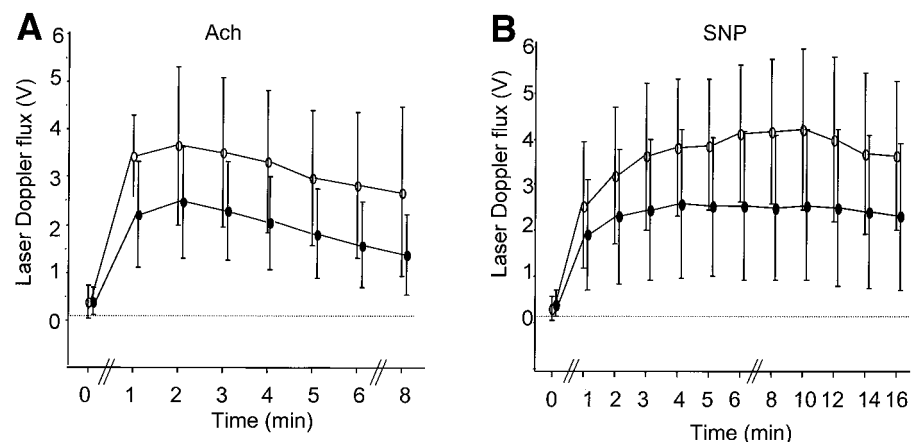

**Figure 1**—Responses to Ach (A) and SNP (B) in nonnutritive skin microcirculation of men with (●) and without (○) heredity for type 2 diabetes. Values are means ± SD for n = 10. The overall responses to Ach and SNP, respectively, were lower (P = 0.03) in subjects with versus without diabetes heredity.

0.04), BMI (22.2 ± 2.0 vs. 23.0 ± 2.7 kg/m<sup>2</sup>), blood pressure, inflammatory variables, or lipid profiles between the groups.

Baseline values of nonnutritive skin microcirculation did not differ (with heredity, 0.35 ± 0.29 vs. without heredity, 0.37 ± 0.35 V). The overall response to Ach was smaller in the group with versus without diabetes heredity (P < 0.03) (Fig. 1). The maximal microcirculatory increase (maximal laser doppler flux minus baseline laser doppler flux) after stimulation with Ach was lower (P < 0.05) in the group with (2.27 ± 1.06 V) than in the group without (3.91 ± 2.15 V) diabetes heredity. Similarly, the overall vasodilatory response to SNP was lower (P < 0.03) in the group with versus without diabetes heredity (Fig. 1), and the maximal microcirculatory increase was reduced (P = 0.04) in those with (2.70 ± 1.55 V) versus without diabetes heredity (4.43 ± 1.85 V).

Nutritive skin capillary circulation, as measured by resting CBV, peak CBV, and time-to-peak CBV, did not differ between the groups. No significant differences were found in brachial artery peak flow velocity FMD or nitroglycerine-induced dilatation between the groups.

**CONCLUSIONS**— The studies of micro- and macrovascular function in healthy normal-weight middle-aged men showed that the subjects with diabetes heredity exhibited impaired microvascular responses to both endothelium- and

nonendothelium-dependent stimuli in nonnutritive skin microcirculation whereas no disturbances could be detected in the nutritive capillary circulation or in the macrocirculation (brachial artery). The functional disturbances in nonnutritive skin microcirculation were demonstrated despite normal body dimensions, normal glucose tolerance, and normal insulin sensitivity. Nonnutritive microcirculation includes arterioli and arteriovenous connections, which have different regulation and morphology compared with capillaries and macrocirculation. Alternatively, the small sample size of our study may have precluded detection of disturbances in macrovascular reactivity. In summary, genetic factors may contribute to the early functional microvascular abnormalities in the development of type 2 diabetes and/or cardiovascular disease.

**Acknowledgments**— The study was supported by grants from the Swedish Research Council, the Stockholm County Council, the Swedish Diabetes Association, the Fam S. Persson Foundation, and the Novo Nordisk Foundation Consortium.

**References**

1. Seaquist ER, Goetz FC, Rich S, Barbosa J: Familiar clustering of diabetic kidney disease: evidence for genetic susceptibility to diabetic nephropathy. *N Engl J Med* 320: 1161–1165, 1989
2. Borch-Johnsen K, Norgaard K, Hommel E, Mathiesen ER, Jensen JS, Deckert T,

- Parving HH: Is diabetic nephropathy an inherited complication? *Kidney Int* 41:719–722, 1992
3. Moczulski DK, Rogus JJ, Antonellis A, Warram JH, Krolewski AS: Major susceptibility locus for nephropathy in type 1 diabetes on chromosome 3q: results of novel discordant sib-pair analysis. *Diabetes* 47:1164–1169, 1998
4. Reichard P, Nilsson B-Y, Rosenqvist U: The effect of long-term intensified insulin treatment on the development of microvascular complications of diabetes mellitus. *N Engl J Med* 329:304–309, 1993
5. The Diabetes Control and Complication Trial Research Group: The effect of intensive treatment of diabetes on the development and progression of long-term complications in insulin-dependent diabetes mellitus. *N Engl J Med* 329:977–986, 1993
6. United Kingdom Prospective Diabetes Study Group: UK Prospective Diabetes Study 33: Intensive blood glucose control with sulfonylureas or insulin compared with conventional treatment and risk for complications in patients with type 2 diabetes. *Lancet* 352:837–853, 1998
7. Caballero AE, Arora S, Saouaf R, Lim SC, Smakowski P, Park JY, King GL, LoGerfo FW, Horton ES, Veves A: Microvascular and macrovascular reactivity is reduced in subjects at risk for type 2 diabetes. *Diabetes* 48:1856–1862, 1999
8. Grill V, Persson G, Carlsson S, Norman A, Alvarsson M, Östenson C-G, Svanström L, Efendic S: Family history of diabetes in middle-aged Swedish men is a gender unrelated factor which associates with insulinopenia in newly diagnosed diabetic subjects. *Diabetologia* 42:15–23, 1999
9. De Fronzo RA, Tobin JD, Andres R: Glucose clamp technique: a method for quantifying insulin secretion and resistance. *Am J Physiol Endocrinol Metab* 237:E214–E223, 1979
10. Morris SJ, Shore AC, Tooke JE: Responses of the skin microcirculation to acetylcholine and sodium nitroprusside in patients with NIDDM. *Diabetologia* 38:1337–1344, 1995
11. Katz A, Ekberg K, Johansson B-L, Wahren J: Diminished skin blood flow in type 1 diabetes: evidence for non-endothelium-dependent dysfunction. *Clin Sci* 101:59–64, 2001
12. Bollinger A, Fagrell B: *Clinical Capillaroscopy: A Guide to Its Use in Clinical Research and Practice*. Lewiston, NY, Hogrefe & Huber Publishers, 1990
13. Jörneskog G: *Functional Microangiopathy in the Digital Skin of Patients With Diabetes Mellitus*. PhD thesis, Stockholm, Sweden, Karolinska Institute, 1995
14. Richardson D, Schwartz R: Comparison of resting capillary flow dynamics in the

- finger and toe nailfolds. *Microcirc Endothelium Lymphatics* 1:645–656, 1984
15. Jörneskog G, Brismar K, Fagrell B: Skin capillary circulation severely impaired in toes of patients with IDDM, with and without late diabetic complications. *Diabetologia* 38:474–478, 1995
  16. Jörneskog G, Brismar K, Fagrell B: Pronounced skin capillary ischemia in the feet of diabetic patients with bad metabolic control. *Diabetologia* 41:410–415, 1998
  17. Jörneskog G, Brismar K, Fagrell B: Skin capillary circulation is more impaired in toes of diabetic than non-diabetic patients with peripheral vascular disease. *Diabet Med* 12:36–41, 1995
  18. Celermajer DS, Sorensen KE, Gooch VM, Spiegelhalter DJ, Miller OI, Sullivan ID, Lloyd JK, Deanfield JE: Non-invasive detection of endothelial dysfunction in children and adults at risk of atherosclerosis. *Lancet* 340:1111–1115, 1992
  19. Lundman P, Eriksson MJ, Stuhlinger M, Cooke JP, Hamsten A, Tornvall P: Mild-to-moderate hypertriglyceridemia in young men is associated with endothelial dysfunction and increased plasma concentration of asymmetric dimethylarginine. *J Am Coll Cardiol* 38:111–116, 2001
